# Supplementary material
Source: publisher figshare collection journal article supplement (https://tandf.figshare.com/ndownloader/files/38306587)
Supplement: Supplementary file 1 [file 38306587]

| *Supplementary Table 1. Differences in sociodemographics between eligible participants and participants that opted to engage in the COVID assessment* | | | | |
| --- | --- | --- | --- | --- |
|  | N (parent study)=  165 | N (COVID assessment)=  125 | Statistic (t/χ2) | *p* |
| Demographics |  |  |  |  |
| Male sex (%) | 66.1 | 57.60 | 1.82 | .17 |
| Agea | 46.59 (12.14) | 49.11 (12.13) | 1.75 | .08 |
| Race (%) |  |  |  |  |
| Black or African American | 16.3 | 17 | .55 | .76 |
| White or Caucasian | 76 | 78 |  |  |
| Other | 8 | 6 |  |  |
| *Note.* Continuity correction of Pearson's chi-square was used in the case of 2x2 contingency tables.  aMean (SD). | | | | |

*Supplementary Table 2. Zero order correlations between latent profile indicators*

|  | 2 | 3 | 4 | 5 | 6 | 7 | 8 | 9 | 10 | 11 | 12 | 13 | 14 | 15 | 16 | 17 | 18 |
| --- | --- | --- | --- | --- | --- | --- | --- | --- | --- | --- | --- | --- | --- | --- | --- | --- | --- |
| 1. Education | .357** | .354** | .190* | .204* | .249** | .192* | .166 | .127 | .051 | -.090 | .043 | .038 | .072 | .006 | .029 | -.022 | -.013 |
| 2. Work | 1 | .509** | .346** | .352** | .323** | .364** | .316** | .163 | .133 | -.009 | -.104 | -.065 | .032 | -.076 | .003 | -.109 | -.001 |
| 3. Finances |  | 1 | .362** | .360** | .361** | .397** | .404** | .235** | .288** | -.427** | -.269 | -.223* | -.086 | -.142 | -.142 | -.223* | -.156 |
| 4. Social relationships |  |  | 1 | .581** | .619** | .569** | .448** | .594** | .445** | -.039 | -.168 | -.078 | -.178 | -.268** | -.192* | -.092 | -.089 |
| 5. Romantic relationships |  |  |  | 1 | .540** | .446** | .434** | .409** | .284** | -.174 | -.204* | -.207* | -.253** | -.290** | -.280** | -.211* | -.161 |
| 6. Quality of life |  |  |  |  | 1 | .774** | .596** | .543** | .468** | -.099 | -.224* | -.135 | -.104 | -.280** | -.287** | -.145 | -.010 |
| 7. Mental Health |  |  |  |  |  | 1 | .691** | .513** | .576** | -.114 | -.299** | -.195* | -.191* | -.364** | -.358** | -.194* | -.037 |
| 8. Sleep |  |  |  |  |  |  | 1 | .561** | .565** | -.271** | -.309** | -.275** | -.249** | -.269** | -.261** | -.236** | -.097 |
| 9. Physical Health/Exercise |  |  |  |  |  |  |  | 1 | .640** | -.055 | -.131 | -.123 | -.148 | -.188* | -.141 | -.057 | .011 |
| 10. Nutrition |  |  |  |  |  |  |  |  | 1 | -.214* | -.218* | -.204* | -.158 | -.295** | -.243** | -.193* | -.092 |
| 11. Expenses |  |  |  |  |  |  |  |  |  | 1 | .487** | .463** | .356** | .364** | .455** | .353** | .411** |
| 12. Stress |  |  |  |  |  |  |  |  |  |  | 1 | .836** | .633** | .534** | .693** | .634** | .589** |
| 13. Anxiety |  |  |  |  |  |  |  |  |  |  |  | 1 | .658** | .596** | .747** | .535** | .647** |
| 14. Sadness |  |  |  |  |  |  |  |  |  |  |  |  | 1 | .636** | .733** | .408** | .618** |
| 15. Irritability |  |  |  |  |  |  |  |  |  |  |  |  |  | 1 | .710** | .462** | .511** |
| 16. Distress |  |  |  |  |  |  |  |  |  |  |  |  |  |  | 1 | .584** | .622** |
| 17. Disruption |  |  |  |  |  |  |  |  |  |  |  |  |  |  |  | 1 | .556** |
| 18. Future |  |  |  |  |  |  |  |  |  |  |  |  |  |  |  |  | 1 |

*Note.* **p* <.05; ***p* <.001

| *Supplementary Table 3.* *Perceived impact of the COVID-19 lockdown on lifestyle and experiential domains by class (N = 125)* | | | | | | | | | | | | | |  | |
| --- | --- | --- | --- | --- | --- | --- | --- | --- | --- | --- | --- | --- | --- | --- | --- |
| **Class 1 ‘moderately impacted’ (n = 41)** | | | | | | **Class 2 ‘severely impacted’ (n = 84)** | | | | | |  |  |  | |
|  | Very negative | Somewhat negative | Neutral | Somewhat positive | Very positive |  | Very negative | Somewhat negative | Neutral | Somewhat positive | Very positive | *ꭓ*2*/t* | *p* | *Cramer’s V/d* |
| **Lifestyle** |  |  |  |  |  |  |  |  |  |  |  |  |  |  |
| Education: n (%) | 3 (7.3) | 3 (7.3) | 26 (63.4) | 8 (19.5) | 1 (2.4) |  | 5 (6) | 8 (9.5) | 58 (69) | 7 (8.3) | 6 (7.1) | 4.32 | .36 | .19 |
| Work: n (%) | 9 (22) | 7 (17.1) | 19 (46.3) | 3 (7.3) | 3 (7.3) |  | 25 (30.1) | 18 (21.7) | 35 (42.2) | 1 (1.2) | 4 (4.8) | 4.55 | .34 | .19 |
| Finances: n (%) | 3 (7.5) | 9 (22.5) | 21 (52.5) | 4 (10) | 3 (7.5) |  | 29 (34.9) | 23 (27.7) | 20 (24.1) | 7 (8.4) | 4 (4.8) | 15.04 | .005 | .35 |
| Social relationships: n (%) | 6 (14.6) | 12 (29.3) | 13 (31.7) | 8 (19.5) | 2 (4.9) |  | 31 (37.8) | 27 (32.9) | 16 (19.5) | 5 (6.1) | 3 (3.7) | 11.47 | .02 | .31 |
| Romantic Relationships: n (%) | 2 (4.9) | 4 (9.8) | 25 (61) | 7 (17.1) | 3 (7.3) |  | 24 (28.6) | 17 (20.2) | 35 (41.7) | 4 (4.8) | 4 (4.8) | 16.45 | .002 | .36 |
| Quality of life: n (%) | 5 (12.5) | 6 (15) | 19 (47.5) | 6 (15) | 4 (10) |  | 23 (27.4) | 31 (36.9) | 22 (26.2) | 4 (4.8) | 4 (4.8) | 15.41 | .004 | .35 |
| Mental Health: n (%) | 4 (9.8) | 8 (19.5) | 19 (46.3) | 6 (14.6) | 4 (9.8) |  | 25 (29.8) | 35 (41.7) | 16 (19) | 4 (4.8) | 4 (4.8) | 20.44 | ˂.001 | .40 |
| Sleep: n (%) | 1 (2.4) | 7 (17.1) | 19 (46.3) | 8 (19.5) | 6 (14.6) |  | 14 (16.7) | 26 (31) | 36 (42.9) | 2 (2.4) | 6 (7.1) | 18.45 | .001 | .38 |
| Physical Health/Exercise: n (%) | 5 (12.2) | 10 (24.4) | 17 (41.5) | 5 (12.2) | 4 (9.8) |  | 26 (31) | 29 (34.5) | 21 (25) | 2 (2.4) | 6 (7.1) | 12.25 | .02 | .31 |
| Nutrition: n (%) | 0 (0) | 5 (12.2) | 23 (56.1) | 9 (22) | 4 (9.8) |  | 12 (14.3) | 28 (33.3) | 33 (39.3) | 5 (6) | 6 (7.1) | 18.79 | .001 | .39 |
| **Experiential** |  |  |  |  |  |  |  |  |  |  |  |  |  |  |
| Expenses: *M* | 29.40A | | | | |  | 60.23I | | | | | -5.29 | ˂001 | 1.03 | |
| Stress: *M* | 39.95B | | | | |  | 80.22J | | | | | -9.75 | ˂001 | 2.03 | |
| Anxiety: *M* | 35.58C | | | | |  | 76.84K | | | | | -10.04 | ˂001 | 2.03 | |
| Sadness: *M* | 33.20D | | | | |  | 72.06L | | | | | -9.92 | ˂001 | 1.88 | |
| Irritability: *M* | 27.50E | | | | |  | 70.83M | | | | | -10.24 | ˂001 | 1.95 | |
| Distressed: *M* | 26.38F | | | | |  | 72.37N | | | | | -12.07 | ˂001 | 2.44 | |
| Disrupted: *M* | 53.65G | | | | |  | 79.91O | | | | | -6.18 | ˂001 | 1.26 | |
| Future: *M* | 48.98H | | | | |  | 76.89P | | | | | -6.66 | ˂001 | 1.38 | |
| *Note*. Superscripts represent people who provide responses on each of the experiential domains.AN=40, BN=40,CN=40, DN=40,  EN=40,  FN=40, GN=40, HN=40; IN=81; JN=79; KN=80; LN=82; MN=78; NN=78; ON=81; PN=82. | | | | | | | | | | | | | | | |
